# Supplementary material for: Power conversion efficiency enhancement based on the bio-inspired hierarchical antireflection layer in dye sensitized solar cells
Source: Royal Society of Chemistry journal article supplement (doi:10.1039/c2nr31214j), 2012-01-01
Supplement: c2nr31214j.pdf [file c2nr31214j.pdf]

## Supporting Information

### Power Conversion Efficiency Enhancement Based on the Bio-inspired Hierarchical Antireflection Layer in Dye Sensitized Solar Cell

Hyo-Jin Ahn, Sun-I Kim, Jong-Chul Yoon, Jung-Soo Lee and Ji-Hyun Jang\*

*Interdisciplinary School of Green Energy, KIER-UNIST Advanced Center for Energy, and  
Low Dimensional Carbon Materials Center, UNIST, Korea*

#### *Fabrication of 2D Diffraction Grating in Polymer*

The substrates were cleaned using ultra-sonication with acetone, isopropanol, and de-ionized water for 10 min and dried by nitrogen blowing. A 100 nm thick photoresist film was obtained by spin-coating at 3000rpm on a  $\text{TiCl}_4$  treated FTO substrate. 2D square patterns with circular holes were fabricated via interference lithography. The samples were double exposed for 6 x 6s by rotating the sample 90 degrees. Before developing the photoresist using PGMEA, a post-exposure bake was conducted at 55 °C for 10min. The diameter and pitch of the patterns were found to be 380 nm and 550 nm, respectively, from SEM measurements.

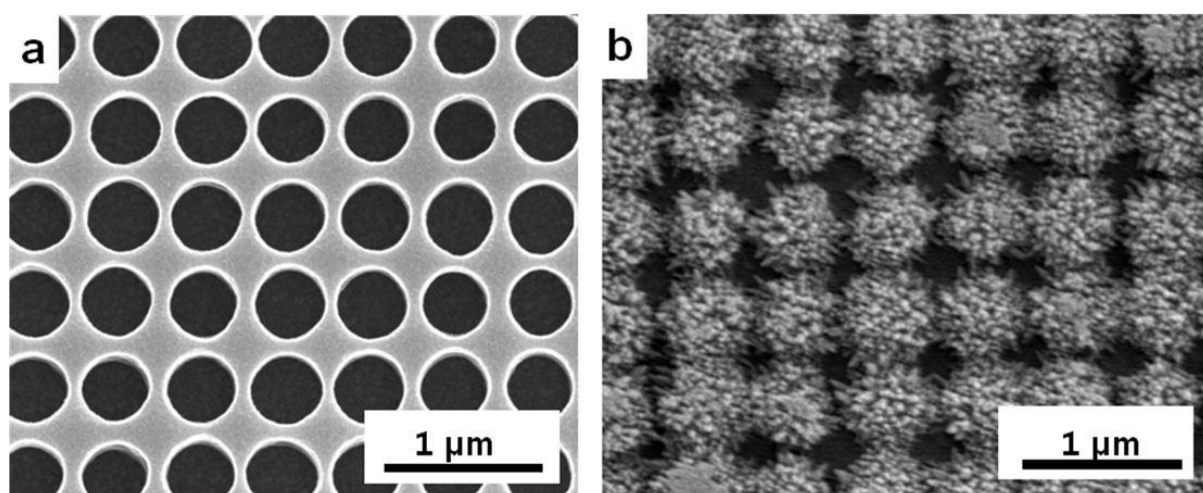

Figure S1: Low magnification SEM images of a) SU-8 pattern b) SU-8/ $\text{TiO}_2$  NWs grown on SU-8 template

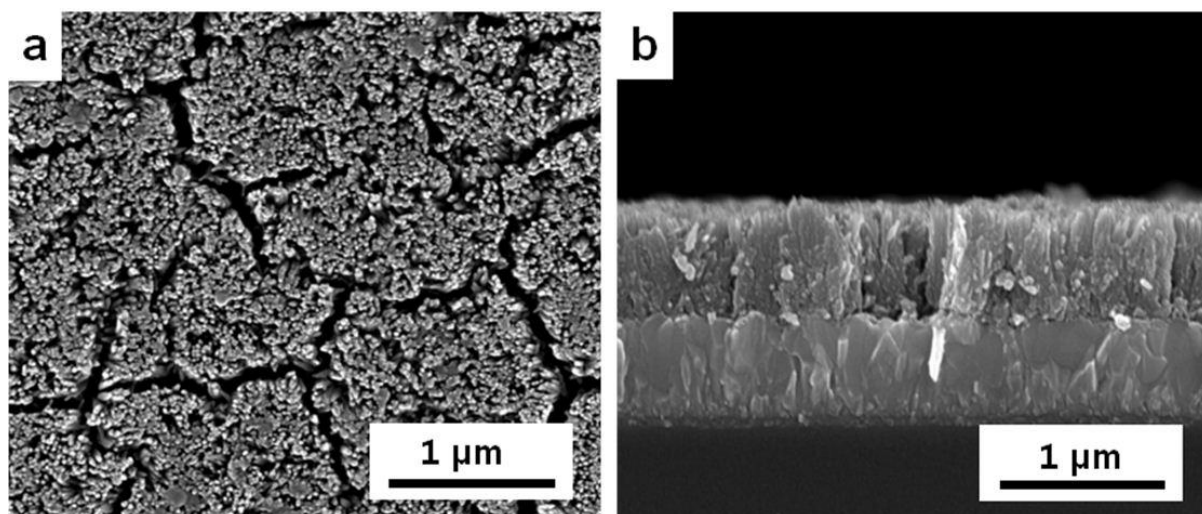

Figure S2. SEM images of a) TiO<sub>2</sub> NWs; b) Cross-sectional image of TiO<sub>2</sub> NWs

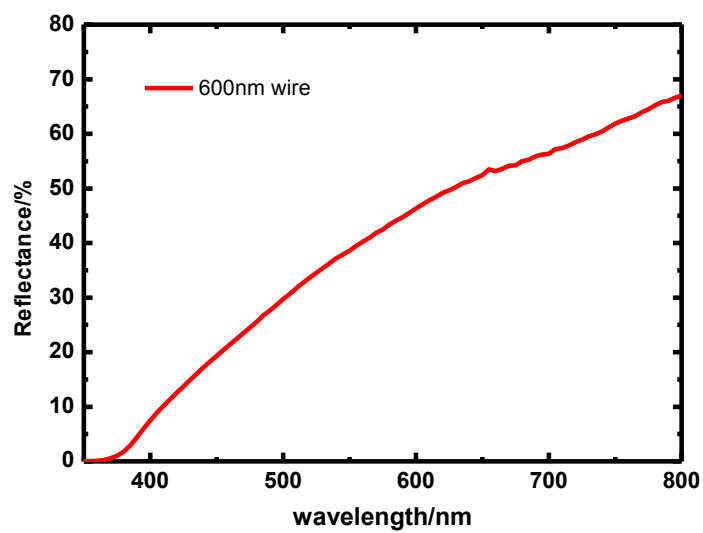

Figure S3. The reflectance of 600 nm TiO<sub>2</sub> NWs

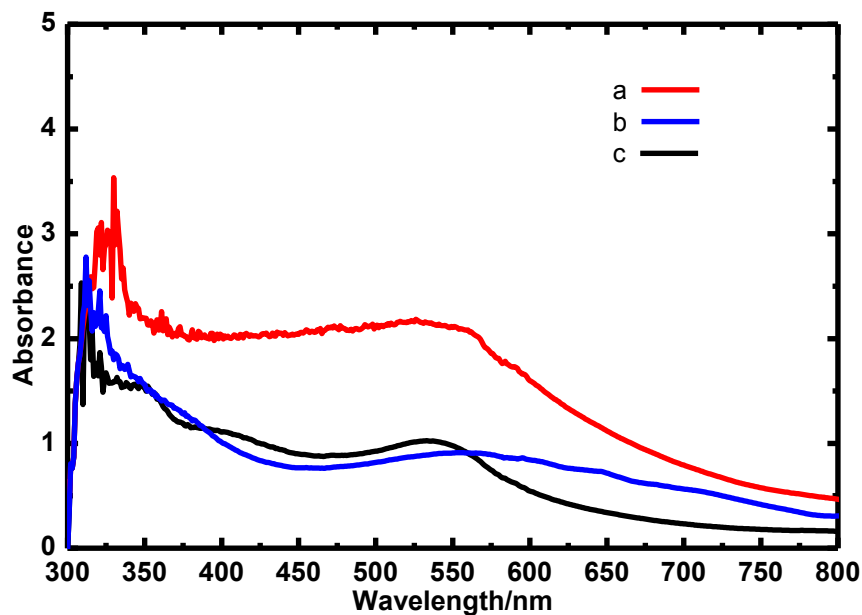

Figure S4. Absorbance spectra of TiO<sub>2</sub> NWs after N-719 dye absorption: a) 5.5 μm hybrid structure; b) 500 nm TiO<sub>2</sub> NWs; c) 5 μm NC-TiO<sub>2</sub> structure

#### *Calculation of effective refractive index of AR layer*

On the basis of the effective medium theory<sup>1, 2</sup>, the effective refractive index  $n_{AR}$  can be approximated to be 1.967 by the equation

$$n_{AR} = [0.68 \times n_{TiO_2}^q + 0.32 \times n_{air}^q]^{1/q}, \text{ where } q = 2/3$$

and the volume ratio of TiO<sub>2</sub>:air = 0.68:0.32 from the SEM image.

1. Li, H. Y.; Jiang, B.; Schaller, R.; Wu, J. F.; Jiao, J., Antireflective Photoanode Made of TiO<sub>2</sub> Nanobelts and a ZnO Nanowire Array. *Journal of Physical Chemistry C* 114, (26), 11375-11380.
2. Stavenga, D. G.; Foletti, S.; Palasantzas, G.; Arikawa, K., Light on the moth-eye corneal nipple array of butterflies. *Proceedings of the Royal Society B-Biological Sciences* **2006**, 273, (1587), 661-667.
